# Supplementary material
Source: ML conference proceedings conference paper supplement (https://openreview.net/forum?id=S80I3NwbbpS)
Supplement: supplementary_material [file attachment]

## Sheet: noncausal cross
Method	LSTF
	ETTh1		ETTh2		ETTm1		Weather		ECL		ETTh1		ETTh2		ETTm1		Weather		ECL
	S-Informer										M-Informer
	MSE↓	MAE↓	MSE↓	MAE↓	MSE↓	MAE↓	MSE↓	MAE↓	MSE↓	MAE↓	MSE↓	MAE↓	MSE↓	MAE↓	MSE↓	MAE↓	MSE↓	MAE↓	MSE↓	MAE↓
vanilla	0.251	0.24	0.266	0.419	0.479	0.619	0.297	0.414	0.439	0.486	1.257	0.905	3.548	1.652	1.028	0.813	0.659	0.602	0.459	0.485
ABC	0.357	0.522	0.294	0.44	0.43	0.586	0.299	0.424	0.512	0.532	1.332	0.934	3.43	1.585	1.037	0.784	0.678	0.616	0.526	0.521
Performer	0.267	0.44	0.255	0.411	0.325	0.493	0.27	0.4	0.798	0.715	1.455	0.966	4.018	1.77	1.203	0.832	0.656	0.615	0.964	0.728
cosFormer	0.311	0.483	0.276	0.426	0.408	0.568	0.277	0.403	0.713	0.651	1.384	0.963	3.912	1.707	1.021	0.792	0.67	0.614	0.551	0.528
Average
Method	LSTF
	Informer
	ETT		Weather		ECL
	MSE↓	MAE↓	MSE↓	MAE↓	MSE↓	MAE↓
vanilla	1.138	0.775	0.478	0.508	0.449	0.486
ABC	1.147	0.809	0.489	0.52	0.519	0.527
Performer	1.254	0.819	0.463	0.508	0.881	0.722
cosFormer	1.219	0.823	0.474	0.509	0.632	0.59
